# Supplementary material
Source: PubMed Central journal article supplement (PMC10155110)

**A**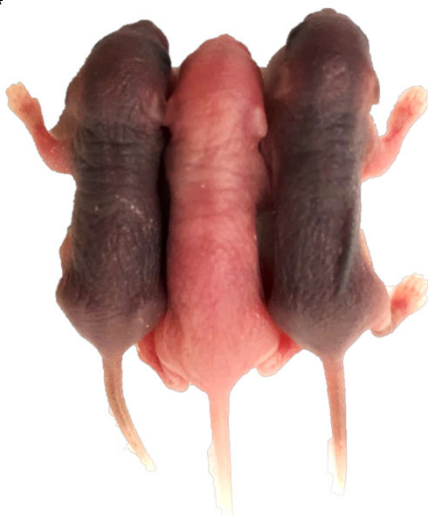**B**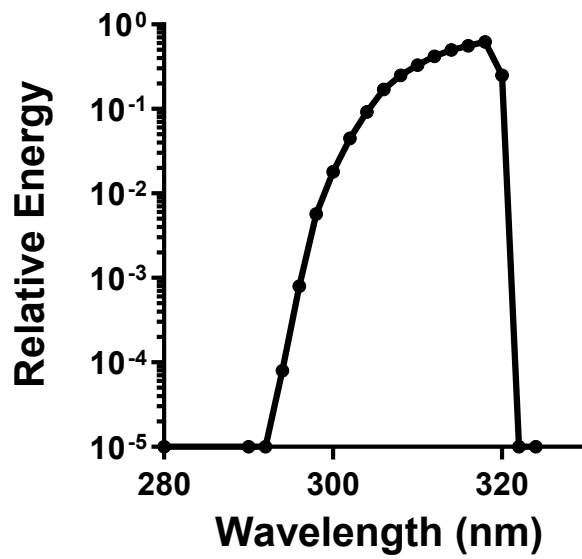

**A**

Albino

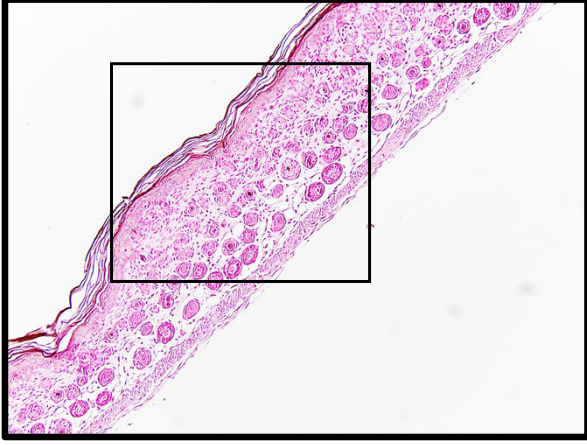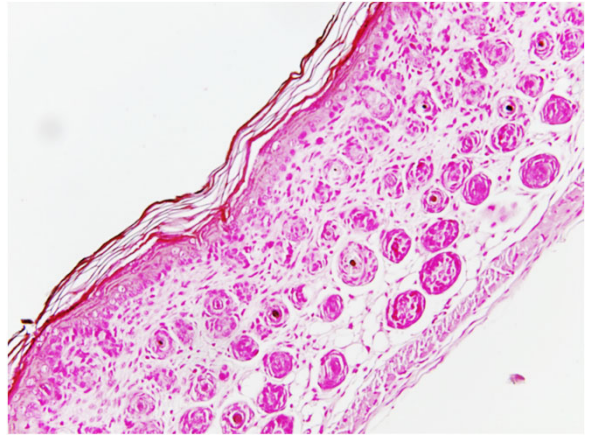

**B**

Black

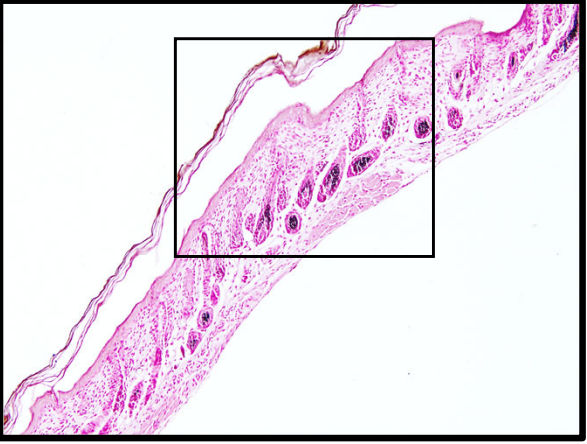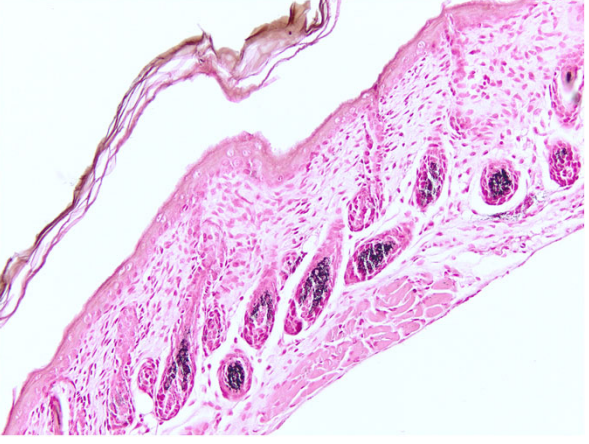

**Figure S2**

**A**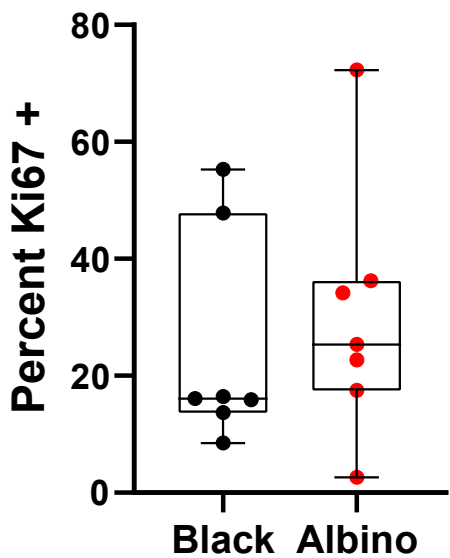**B**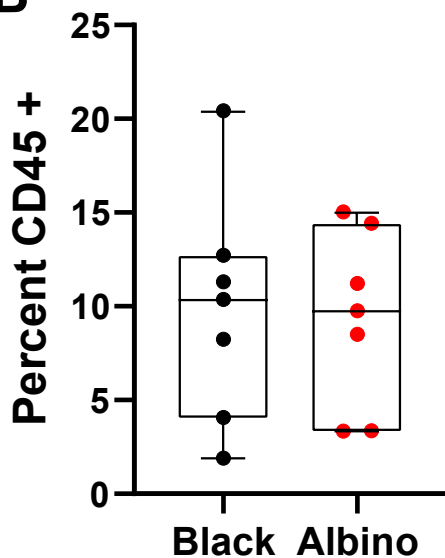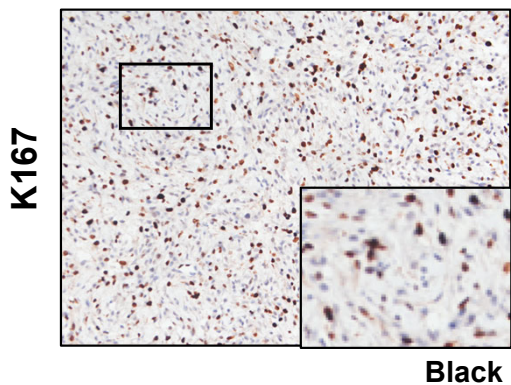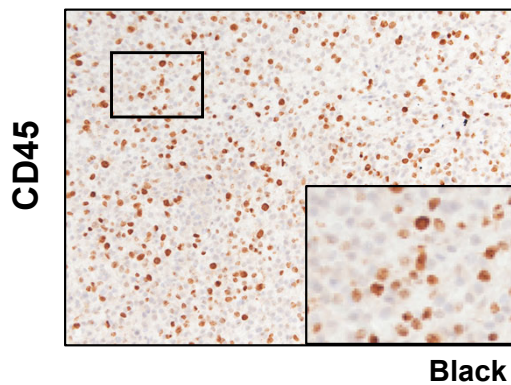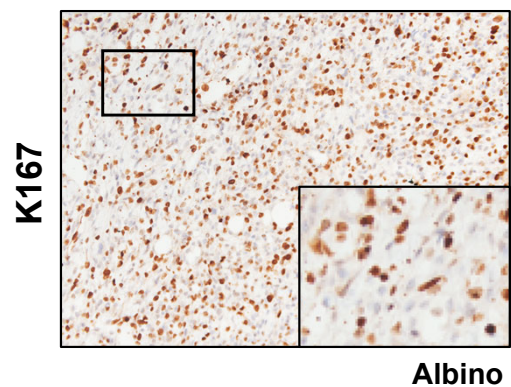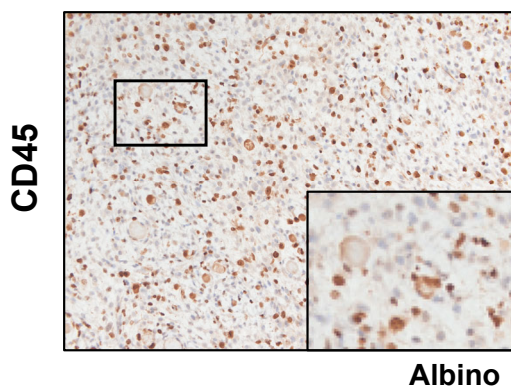

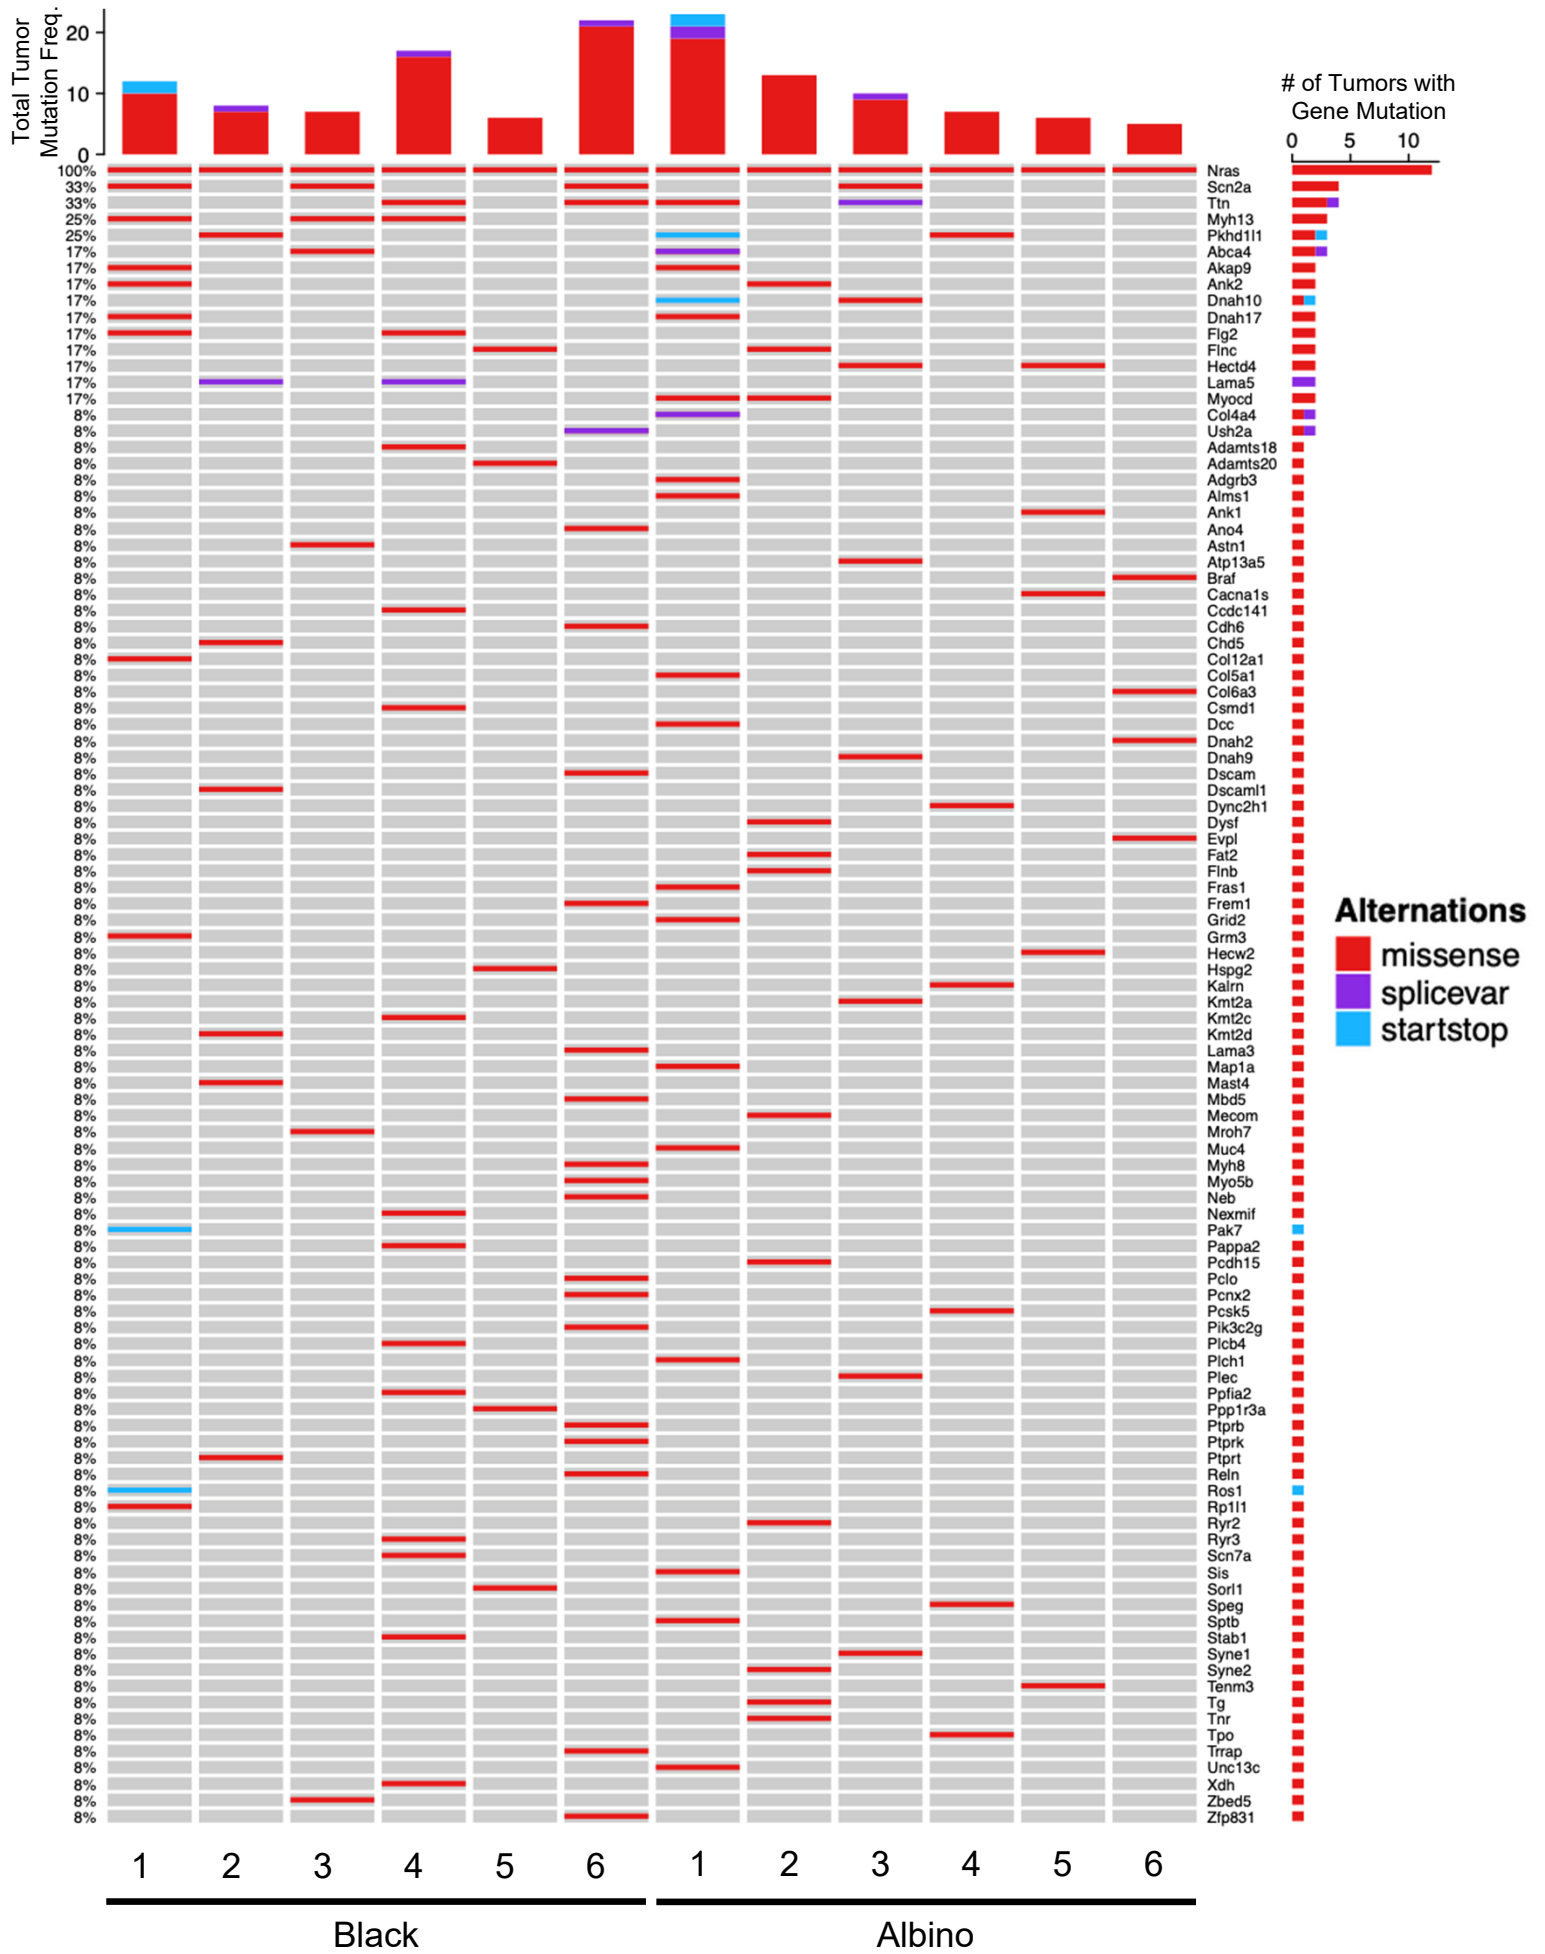

**Figure S4**

Supplement: NIHMS1889090-supplement-Suppl__Materials_Part_2.pdf [file NIHMS1889090-supplement-Suppl__Materials_Part_2.pdf]
